# Supplementary material for: The effect of soil properties on zinc lability and solubility in soils of Ethiopia – an isotopic dilution study
Source: Copernicus journal article supplement (doi:10.5194/soil-7-255-2021), 2021-06-21
Supplement: Supplementary file 1 [file soil-7-255-2021-supplement.pdf]

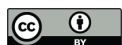

*Supplement of*

**The effect of soil properties on zinc lability and solubility  
in soils of Ethiopia – an isotopic dilution study**

**Abdul-Wahab Mossa et al.**

*Correspondence to:* Elizabeth H. Bailey ([liz.bailey@nottingham.ac.uk](mailto:liz.bailey@nottingham.ac.uk))

The copyright of individual parts of the supplement might differ from the article licence.

## Supplementary Material

Table S1. ICP-MS (iCAP-Q) operating conditions for both multi element and isotope ratio

| Parameter                                      | Isotope analysis | Multi-elements analysis |
|------------------------------------------------|------------------|-------------------------|
| Dwell time (s)                                 | 0.05             | 0.01                    |
| Number of sweeps                               | 50               | 50                      |
| dead time correction (ns)                      | 34.7             | 34.7                    |
| Detector dead time (ns)                        | 35               | 55                      |
| Nebuliser flow rate (L min <sup>-1</sup> )     | 1.120            | 1.105                   |
| Extraction lens voltage (V)                    | -176.5           | -111.3                  |
| Helium flow rate (L min <sup>-1</sup> )        | 4.4              | 4.4                     |
| Coolant gas flow (Ar; L min <sup>-1</sup> )    | 14               | 14                      |
| Auxiliary gas flow rate (L min <sup>-1</sup> ) | 0.8              | 0.8                     |
| Spray chamber temperature (°C)                 | 2.7              | 2.7                     |

Table S2. Correlation matrix among different soil variables

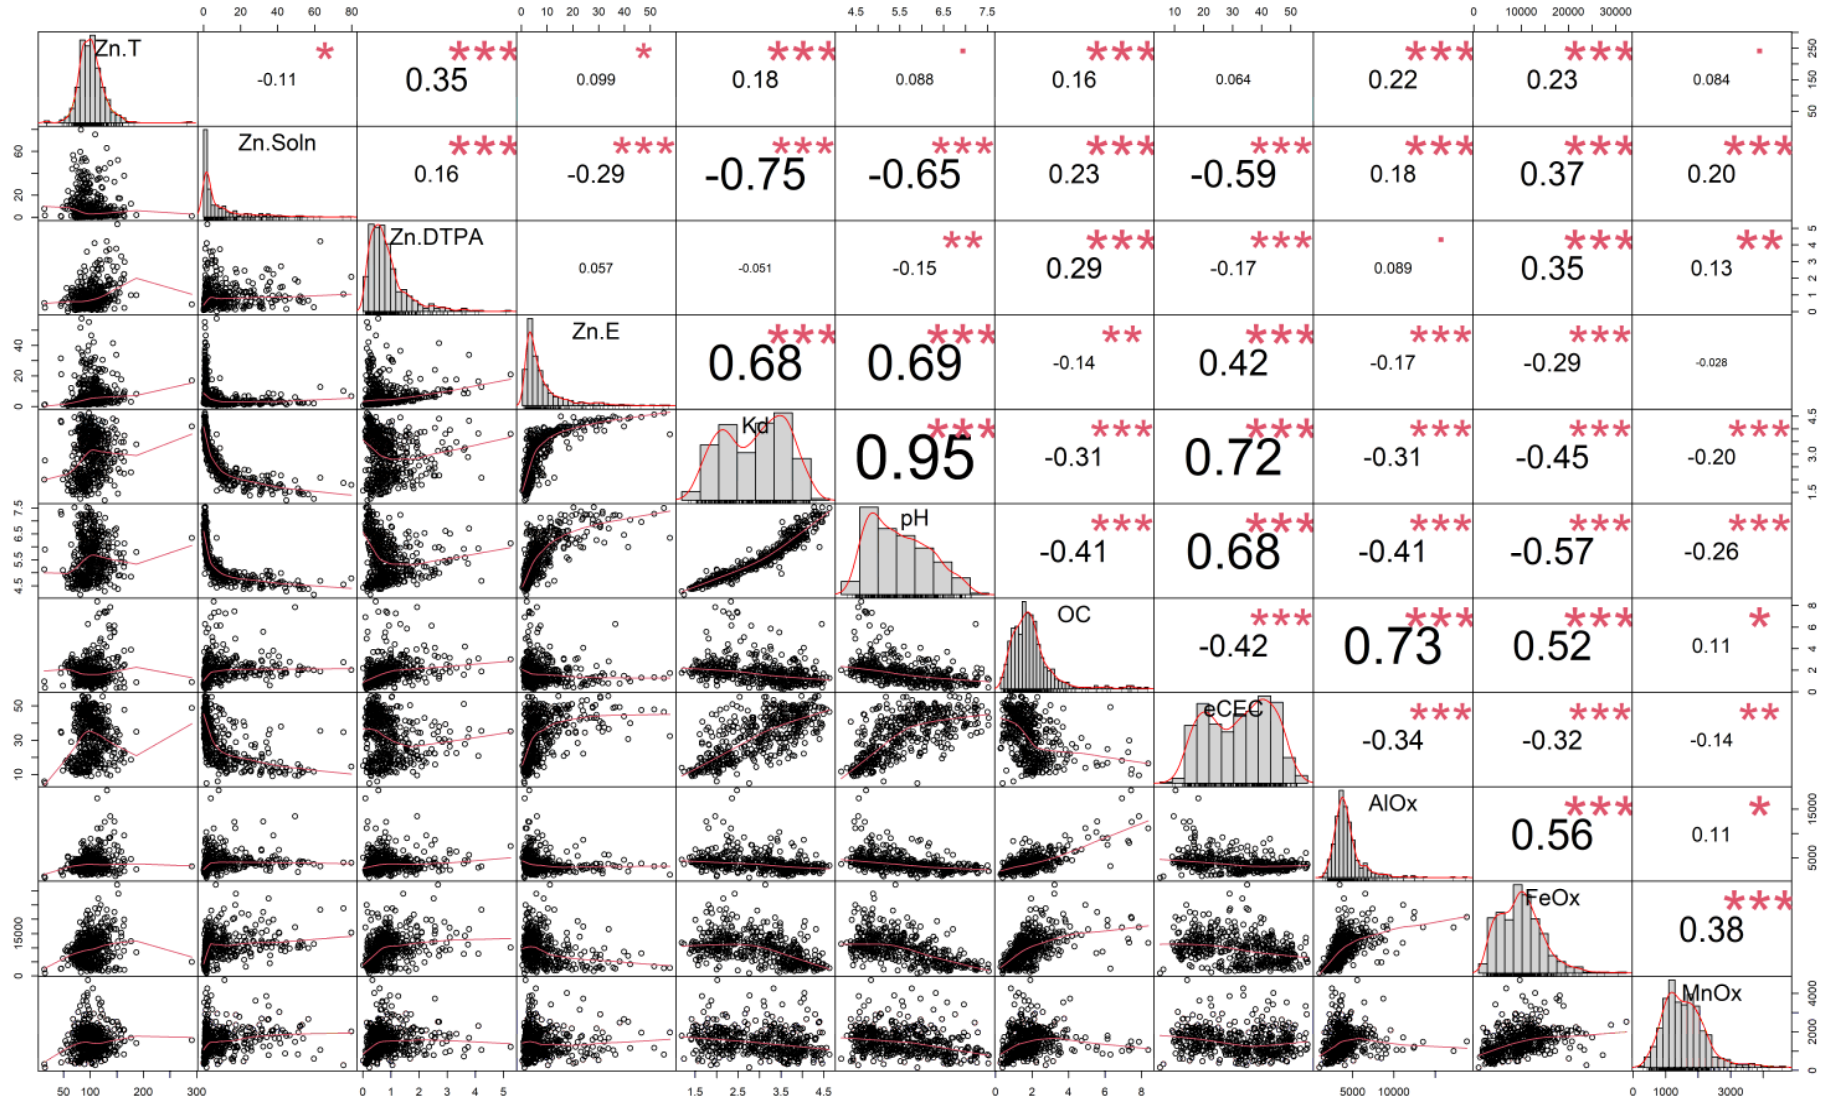

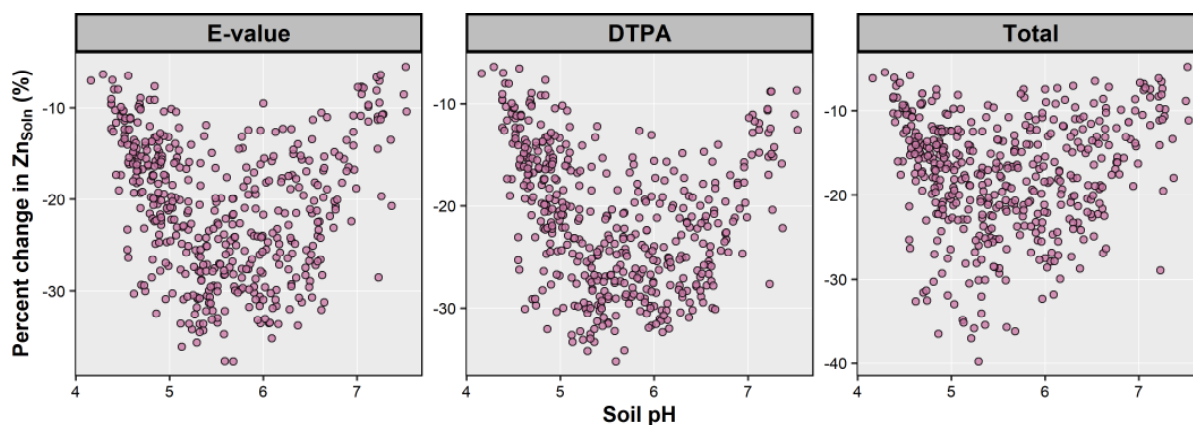

Figure S1. Relationship between soil pH and percent change in Zn<sub>soln</sub> predicted by WHAM7 when assuming only 36%, rather than 50%, of soil organic C is active. Values of Zn<sub>soln</sub> was predicted by WHAM7 using isotopically exchangeable Zn, DTPA-extractable Zn, and total Zn concentration in soil as inputs.

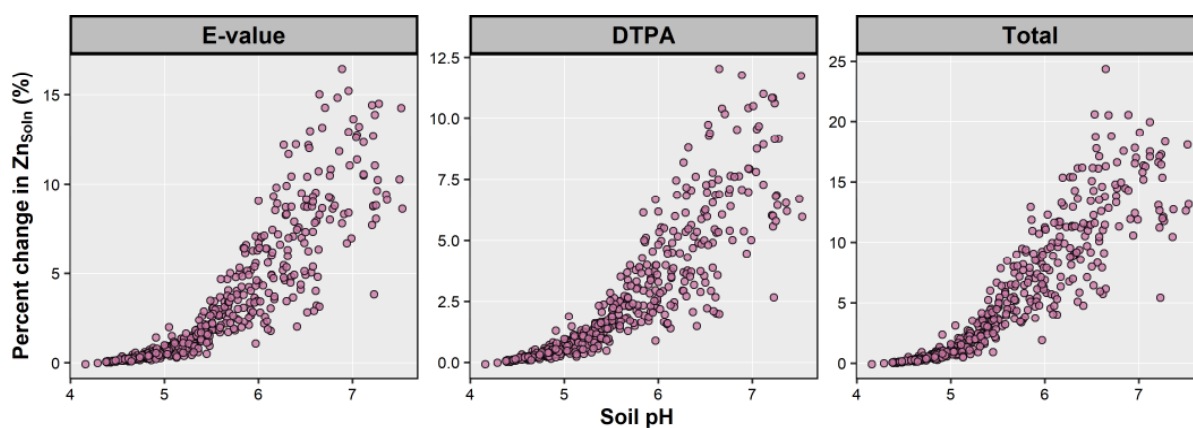

Figure S2. Relationship between soil pH and percent change in Zn concentration in soil solution, when assuming double the concentration of measured amorphous Fe oxide. Zinc concentration in soil solution was predicted using WHAM7 using isotopically exchangeable Zn, DTPA-extractable Zn, and total Zn.
